# Supplementary material for: Third-generation rabies viral vectors allow nontoxic retrograde targeting of projection neurons with greatly increased efficiency
Source: PubMed Central journal article supplement — Cell Rep Methods. 2023 Nov 20;3(11):100644. doi: 10.1016/j.crmeth.2023.100644 (PMC10694603; doi:10.1016/j.crmeth.2023.100644), 2023-11-20
Supplement: mmc1.pdf [file mmc1.pdf]

**Cell Reports Methods, Volume 3**

**Supplemental information**

**Third-generation rabies viral vectors allow  
nontoxic retrograde targeting of projection  
neurons with greatly increased efficiency**

**Lei Jin, Heather A. Sullivan, Mulangma Zhu, Nicholas E. Lea, Thomas K. Lavin, Xin Fu, Makoto Matsuyama, YuanYuan Hou, Guoping Feng, and Ian R. Wickersham**

SUPPLEMENTAL INFORMATION

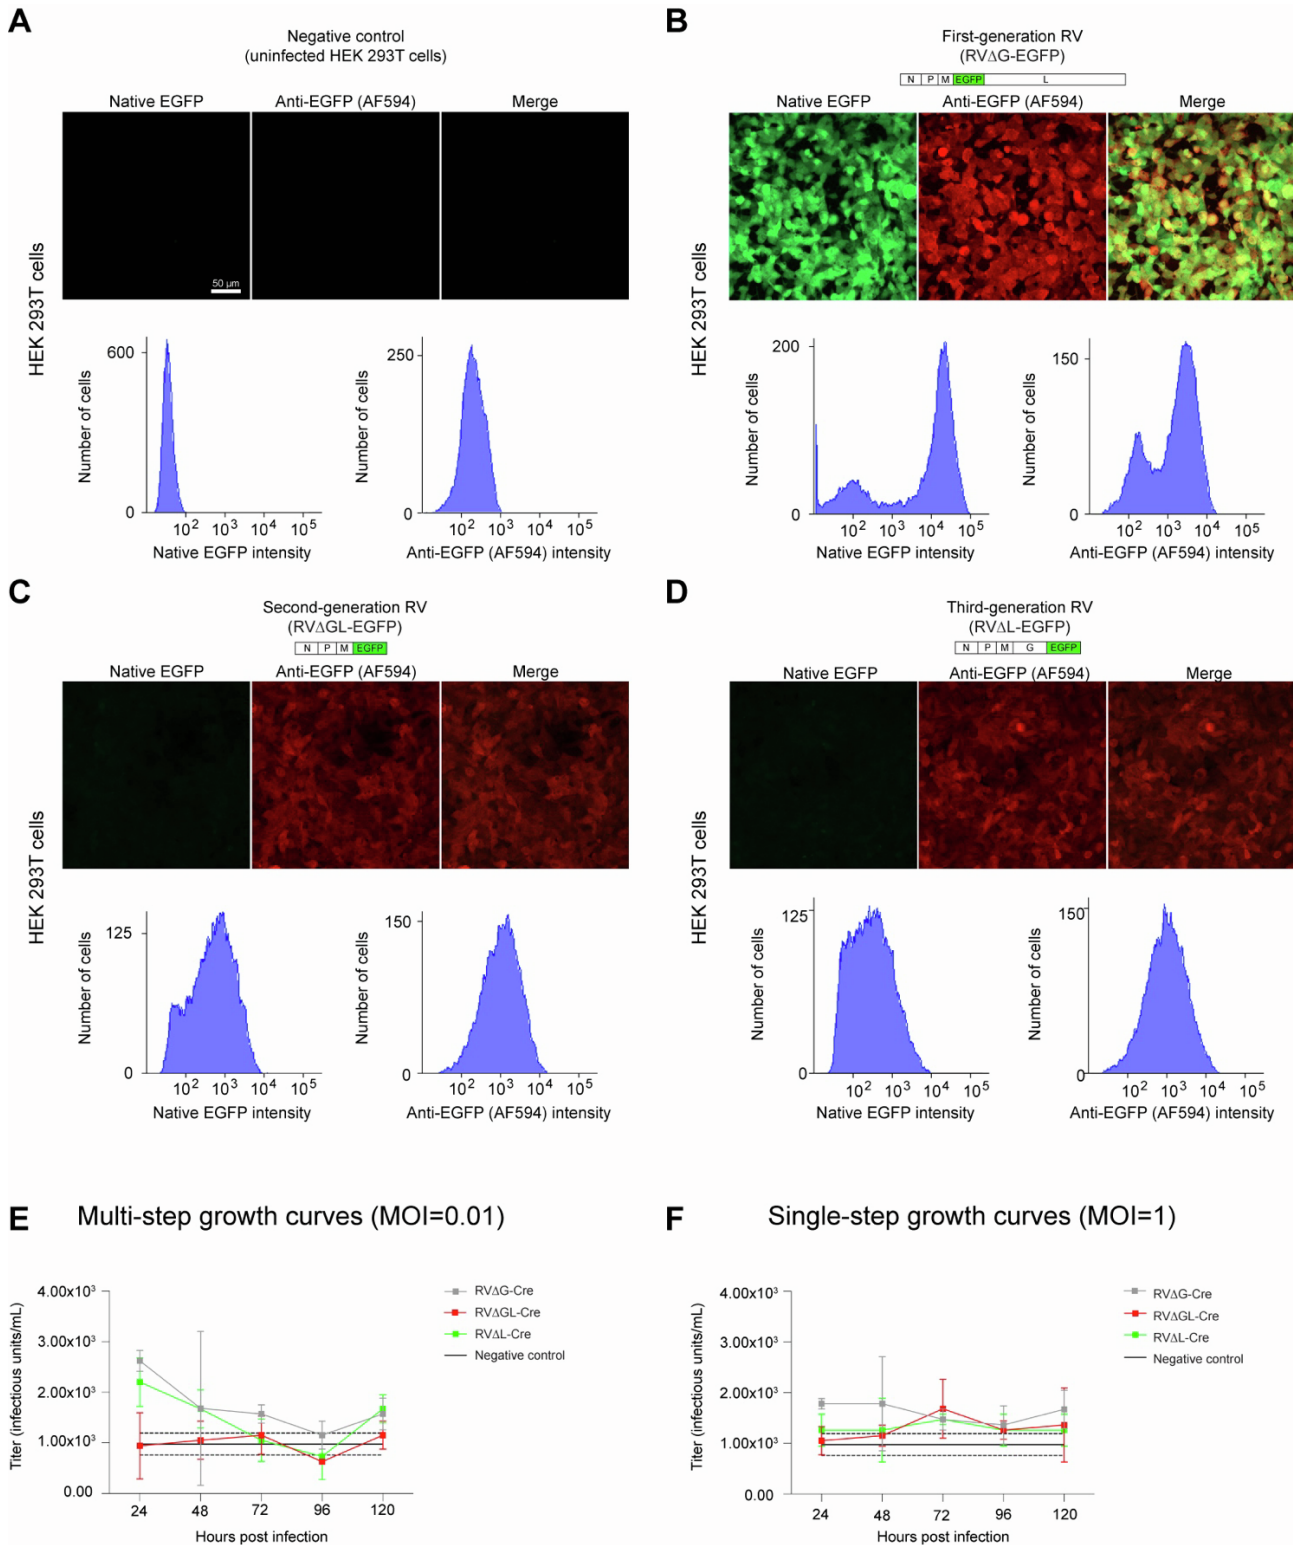

**Supplementary Figure S1.  $\Delta$ L and  $\Delta$ GL viruses express EGFP at similarly low levels, and  $\Delta$ G,  $\Delta$ GL, and  $\Delta$ L viruses do not propagate in non-complementing cells, Related to Figure 1.**

Confocal images and flow cytometric histograms showing native and immunostained EGFP signal in uninfected cells (A) and cells infected with first-generation ( $\Delta$ G) virus (B), second-generation ( $\Delta$ GL) virus (C), or third-generation virus (D) expressing EGFP. Scale bar: 50  $\mu$ m, applies to all images. (E-F), Viral titers in supernatants of BHK-21 cells not expressing any rabies viral genes, infected with  $\Delta$ L,  $\Delta$ GL, or  $\Delta$ G viruses at a multiplicity of infection (MOI) of 0.01 ("multi-step growth curves", panel E) or 1 ("single-step" growth curves, panel F), with supernatants collected every 24 hours for five days. Graphs show mean  $\pm$  s.e.m. Black lines show negative control "titers" calculated from uninfected reporter cells (mean  $\pm$  s.e.m. of 10 samples). Note that the titers in these graphs are 3-4 orders of magnitude lower than those obtained on complementing cells (Figure 1).

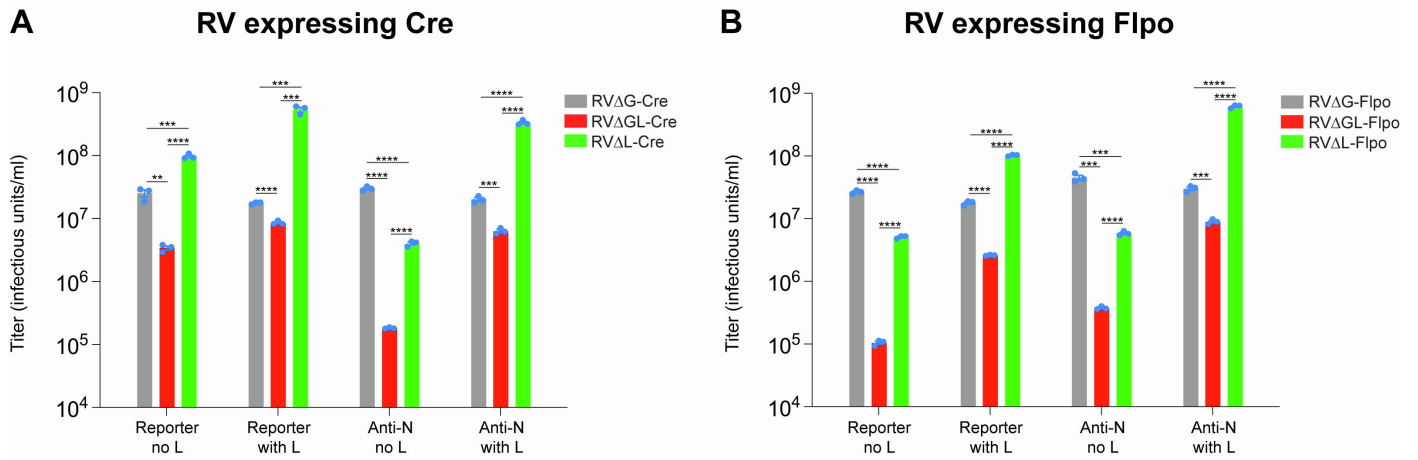

**Supplementary Figure S2. Direct comparisons of titers of  $\Delta G$ ,  $\Delta GL$ , and  $\Delta L$  viruses expressing Cre and Flpo, each titered in four different ways, Related to Figure 1.**

In order to directly compare the titers of the Cre- and Flpo-expressing versions of each of the three generations of rabies viral vectors, we made a fluorescent reporter cell line (293T-FLEX-F14F15S-BC) in which either Cre or Flpo activity causes mCherry expression (see Methods). We further made a version of this reporter line that expresses the rabies viral polymerase gene (293T-FLEX-F14F15S-BC-TTBL, see Methods), in order to amplify the low recombinase expression from  $\Delta GL$  and  $\Delta L$  vectors and thereby unmask subthreshold expression. In the case of  $\Delta L$  viruses, but not  $\Delta GL$  ones, this L expression would also allow replication and spread between cells, confounding interpretation; despite this, we titered the vectors of all three generations with and without L for completeness. After making side-by-side preparations of six viruses, RV $\Delta G$ -Cre, RV $\Delta GL$ -Cre, RV $\Delta L$ -Cre, RV $\Delta G$ -Flpo, RV $\Delta GL$ -Flpo, and RV $\Delta L$ -Flpo (see Methods), we titered them in triplicate by serial dilution on the above two dual reporter cell lines. For an additional readout that was independent of recombinase efficacy, we also immunostained for the rabies virus nucleoprotein, giving a total of four titering methods per virus (mCherry expression versus anti-nucleoprotein signal, with and without L). Noteworthy findings include the following:

- 1) The titer of each of the two  $\Delta L$  viruses significantly exceeds that of the corresponding  $\Delta GL$  virus using any of the four titering methods: i.e., the titer of RV $\Delta L$ -Cre is significantly greater than that of RV $\Delta GL$ -Cre, and the titer of RV $\Delta L$ -Flpo is significantly greater than that of RV $\Delta GL$ -Flpo, regardless of titering method.
- 2) For both  $\Delta GL$  and  $\Delta L$  vectors (but not  $\Delta G$  vectors), the titer of the Cre-expressing version was significantly higher than that of the Flpo-expressing versions, when assessed by fluorescent reporter expression: i.e., the measured titer of RV $\Delta L$ -Cre is significantly greater than that of RV $\Delta L$ -Flpo, and the titer of RV $\Delta GL$ -Cre is significantly greater than that of RV $\Delta GL$ -Flpo, when titering based on reporter expression (and regardless of whether L was expressed *in trans*). However, when nucleoprotein staining was used to determine the presence of virus, the titer of each of the Flpo-expressing  $\Delta GL$  and  $\Delta L$  viruses were actually higher than that of the corresponding Cre-expressing one: that is, the titer of RV $\Delta L$ -Flpo is significantly greater than that of RV $\Delta L$ -Cre, and the titer of RV $\Delta GL$ -Flpo is significantly greater than that of RV $\Delta GL$ -Cre, when titering using nucleoprotein staining, regardless of whether L was expressed *in trans*. These findings are consistent with an interpretation that the lower efficacy of Flpo versus that of Cre, coupled with the intentionally low expression levels of  $\Delta GL$  and  $\Delta L$  vectors, result in lower *de facto* titers (as judged by the percentage of mCherry-labeled reporter cells) and lower numbers of retrogradely labeled neurons *in vivo* (See Figure 2).
- 3) Expression of L *in trans* significantly increases the measured titers of all four  $\Delta GL$  and  $\Delta L$  viruses, whether measured by fluorescent reporter expression or nucleoprotein staining. This is also consistent with the above hypothesis that the intentionally low expression levels characteristic of these vectors may result in artificially low measured titers because of subthreshold expression of recombinase or nucleoprotein.

See Supplementary File S1 for titers and statistical comparisons.

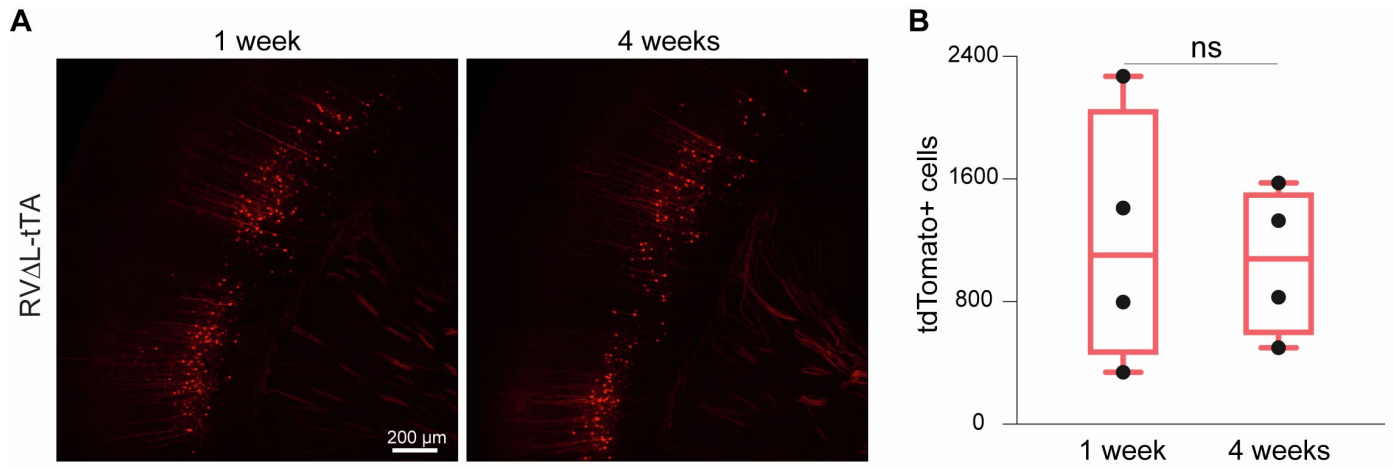

**Supplementary Figure S3. Retrograde targeting with third-generation ( $\Delta$ L) rabies virus expressing the tetracycline transactivator, Related to Figure 2.**

(A) Corticothalamic neurons retrogradely labeled by a  $\Delta$ L virus expressing tTA injected in the somatosensory thalamus of Ai63 reporter mice (tdTomato driven by TRE-tight) 1 week (left image) or 4 weeks (right image) prior to perfusion. Scale bar: 200  $\mu$ m, applies to both images.

(B) Counts of labeled cortical neurons, with each data point being the total number found in one series consisting of every sixth 50  $\mu$ m section from a given brain - see Methods). Numbers are not significantly different between the two time points (single factor ANOVA,  $p = 0.772$ ,  $n = 4$  mice per group). See Supplementary File S1 for counts and statistics).

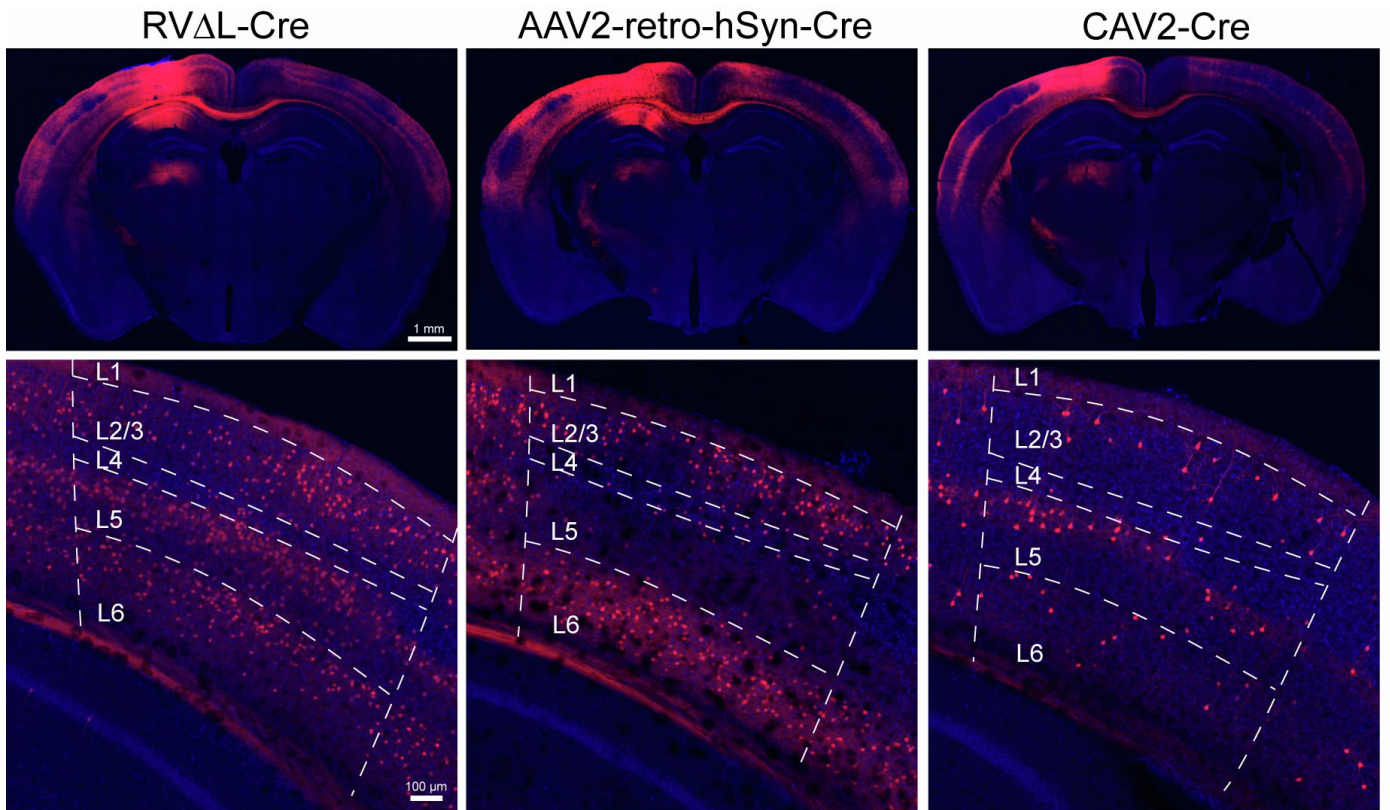

### Primary somatosensory: contralateral

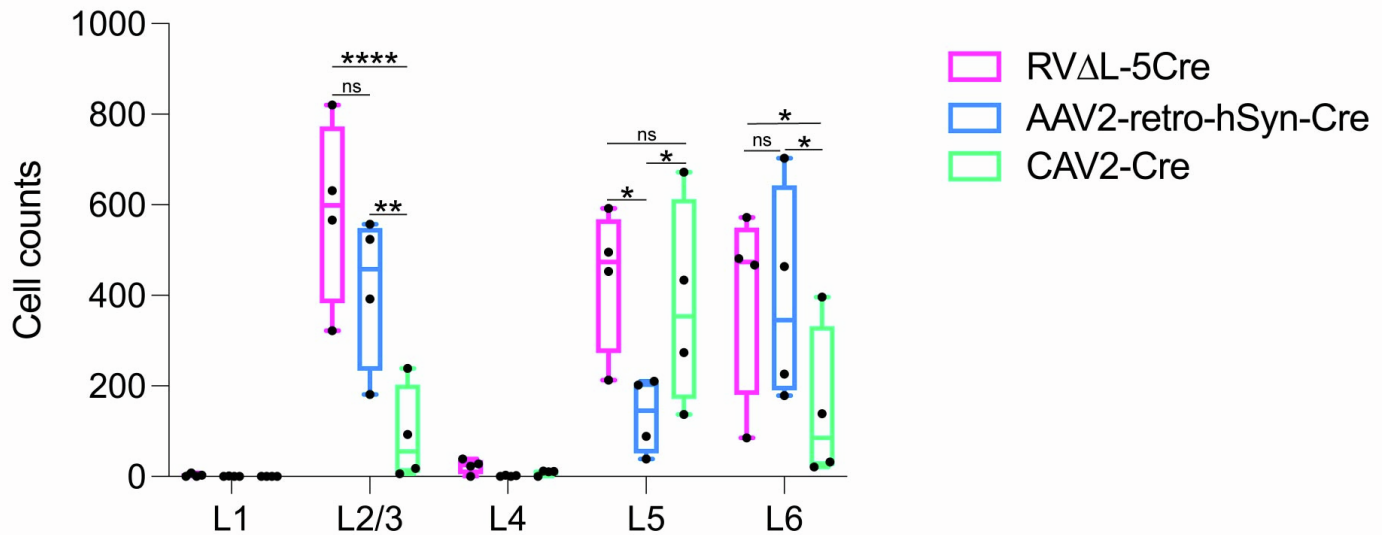

### Supplementary Figure S4. Retrograde labeling by $\Delta$ L rabies virus compared to rAAV2-retro and CAV-2: injections in anteromedial visual cortex (AM), Related to Figure 3.

RV $\Delta$ L-Cre, rAAV2-retro-hSyn-Cre (from Addgene), or CAV-Cre (from the Plateforme de Vectorologie de Montpellier) was injected undiluted into the cortical anteromedial area (AM) of reporter mice, with injections being of equal volumes (200  $\mu$ l); after a 4-week survival time, brain sections were imaged and labeled neurons in several brain regions were counted. Note that each data point is the total number in one series consisting of every sixth 50  $\mu$ m section from a given brain (see Methods) so that the total number of labeled S1 neurons in each brain would be approximately six times the corresponding number shown here. In contralateral primary somatosensory cortex, RV $\Delta$ L labeled more cells in layers 2/3, 5, and 6 than did either of the other two viruses, although the difference between RV $\Delta$ L and the “runner up” in each case (rAAV2-retro in layers 2/3 and 6, CAV-2 in layer 5) was not statistically significant. Few neurons were labeled in layers 1 and 4, and the differences in these layers were not significant. See Supplementary File S1 for all counts and statistical comparisons. See also Supplementary Files S2a – S4b for sets of high-resolution confocal images of series of coronal sections from mice labeled with each of the three viruses injected in AM.
